# Supplementary material for: MTBP, the partner of Treslin, contains a novel DNA-binding domain that is essential for proper initiation of DNA replication
Source: PubMed Central journal article supplement — Mol Biol Cell. 2017 Nov 1;28(22):2998–3012. doi: 10.1091/mbc.E17-07-0448 (PMC5662258; doi:10.1091/mbc.e17-07-0448), 2017-11-01
Supplement: supp_E17-07-0448v1_CombinedSupMats.pdf [file supp_E17-07-0448v1_CombinedSupMats.pdf]

# Supplemental Materials

*Molecular Biology of the Cell*

Kumagai and Dunphy

**Figure S1.** Recombinant protein complexes for add-back experiments. Recombinant versions of full-length human Treslin alone, full-length Treslin in a complex with human MTBP, the Treslin-N fragment in a complex with MTBP, and MTBP alone were purified as described in the Materials and Methods. Preparations were subjected to SDS gel electrophoresis and stained with Coomassie blue.

**Figure S2.** Properties of the CTM domain. (A) A structural model for the CTM domain from human MTBP (residues 813-904) was generated by the Robetta server (left panel). The right panel depicts the published structure of the C-terminal region from budding yeast Sld7 (residues 178-257)(Itou *et al.*, 2015). (B) Sequence alignment of CTM domain from human MTBP and residues 178-257 from yeast Sld7. Predicted and actual helical regions for MTBP and Sld7, respectively, are indicated. (C) A preparation of GST-CTM was cleaved with AcTEV protease and subjected to gel filtration in a Superdex-200 column. Fractions from the column were subjected to SDS gel electrophoresis and stained with Coomassie blue. Data are representative of two independent experiments.

**Figure S3.** EMSA experiments. (A) The EMSA data from Figure 4A was quantitated and plotted as indicated. Bars depict mean  $\pm$  SEM (n=3). (B) The EMSA data from Figure 4D was quantitated and plotted as indicated. Bars depict mean  $\pm$  SEM (n=3).

**Figure S4.** Characterization of mutant MTBP protein complexes. Recombinant complexes of the Treslin-N fragment bound to wild-type (WT),  $\Delta$ C, or 7A versions of MTBP were purified as described in the Materials and Methods. Preparations were subjected to SDS gel electrophoresis and stained with Coomassie blue.

**Figure S5.** FACS profiles of cells expressing wild-type and mutant MTBP proteins. Different lines of human U2OS Flp-In T-REx cells (control and harboring inducible versions of the indicated forms of MTBP) were incubated with doxycycline and treated with control siRNA (left panels) or MTBP siRNA (right panels) as described in Materials and Methods. Cells were labeled with EdU for 30 min and processed for FACS analysis as described in Materials and Methods. Data are representative of three independent experiments.

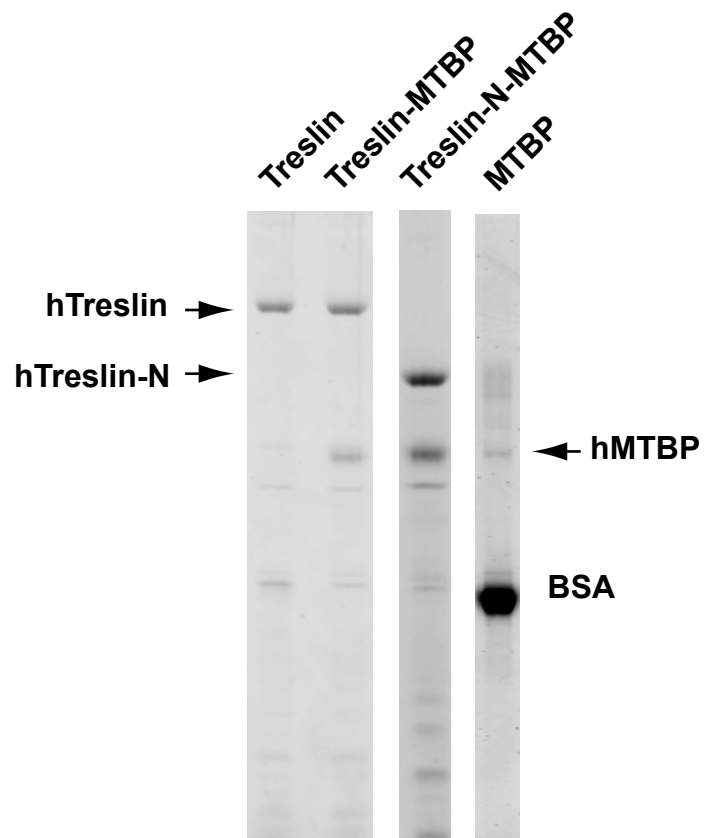

Figure S1

A

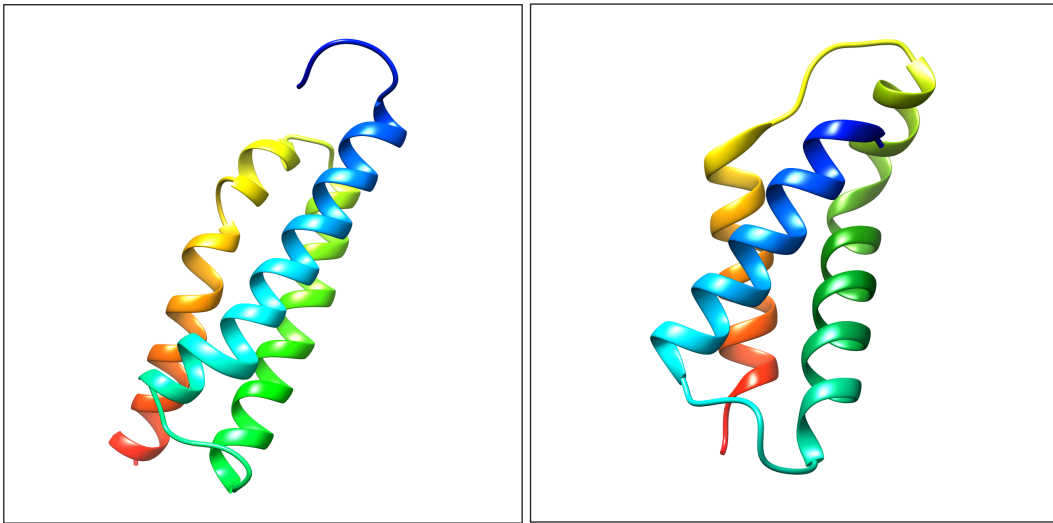

MTBP-CTM

Sld7 C-term

B

```

-----HHHHHHHHHHHHHHHHHHHHHHHHHH-----HHHHHHHHHHHHHHHHHHHHHHHHHH-----HHHHHHHHHHHHHHHHHHHHHHHHHH-----
MTBP-CTM: MHESKTSRQIKESRSQKHTRILKEVVTETLKKHSITETHECFTACSORLFEISKFYLKDLKT-----SRGLFEEMKKTANNAVQVIDWVLEKTSKK
      :.* * : . *.: : * : :.*.: : : : * : :.* : * .
Sld7-C:   -----NDKRLQFN-ETLSKLILGGLRLRGISNSITDYQKLYKITFDAAEFTHRDELKRISMGSGEVSVFESLQETVETL-LKLFTKS-----
      -----HHHHHHHHHHHHHHHHHHHHHHHHHH-----HHHHHHHHHHHHHHHHHHHHHHHHHH-----HHHHHHHHHHHHHHHHHHHHHHHHHH-----

```

C

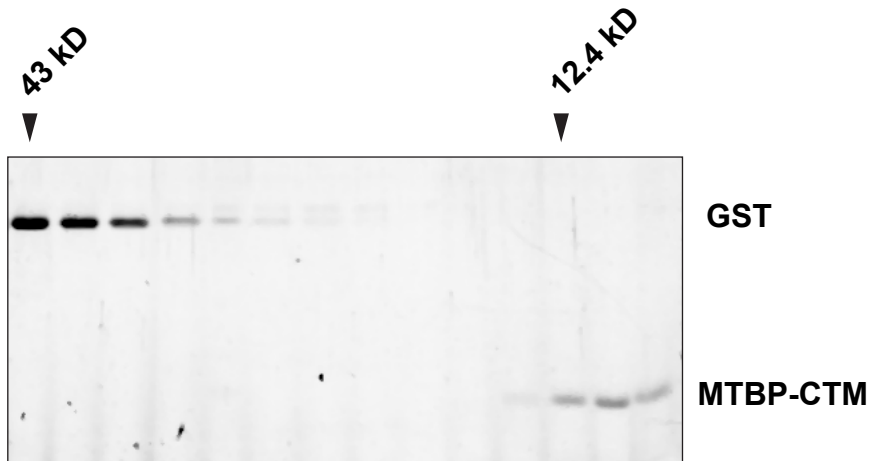

Figure S2

**A**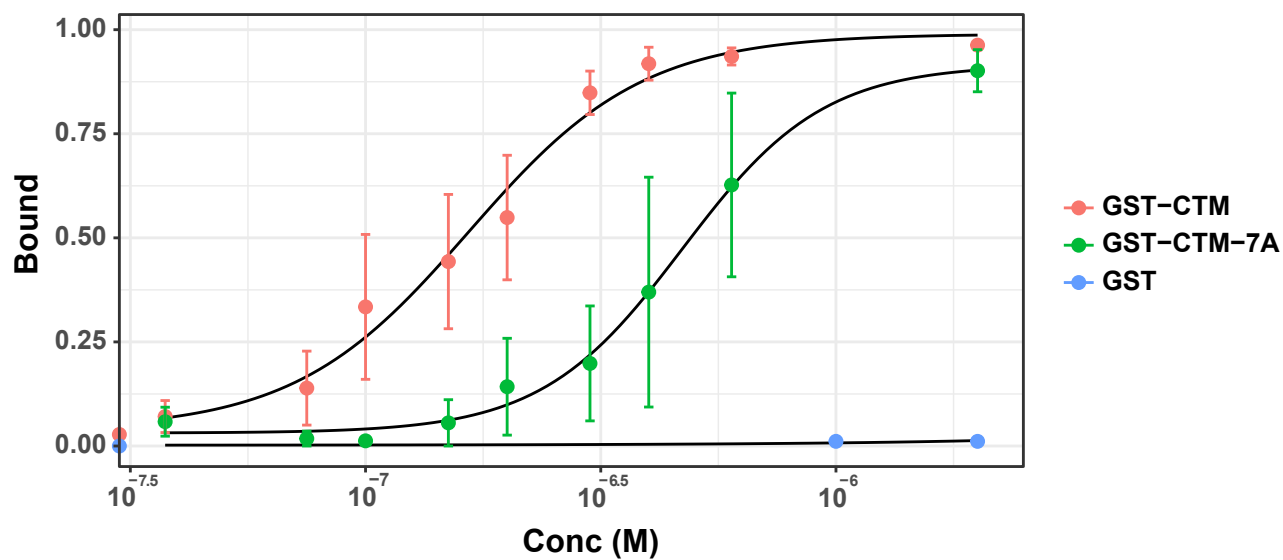**B**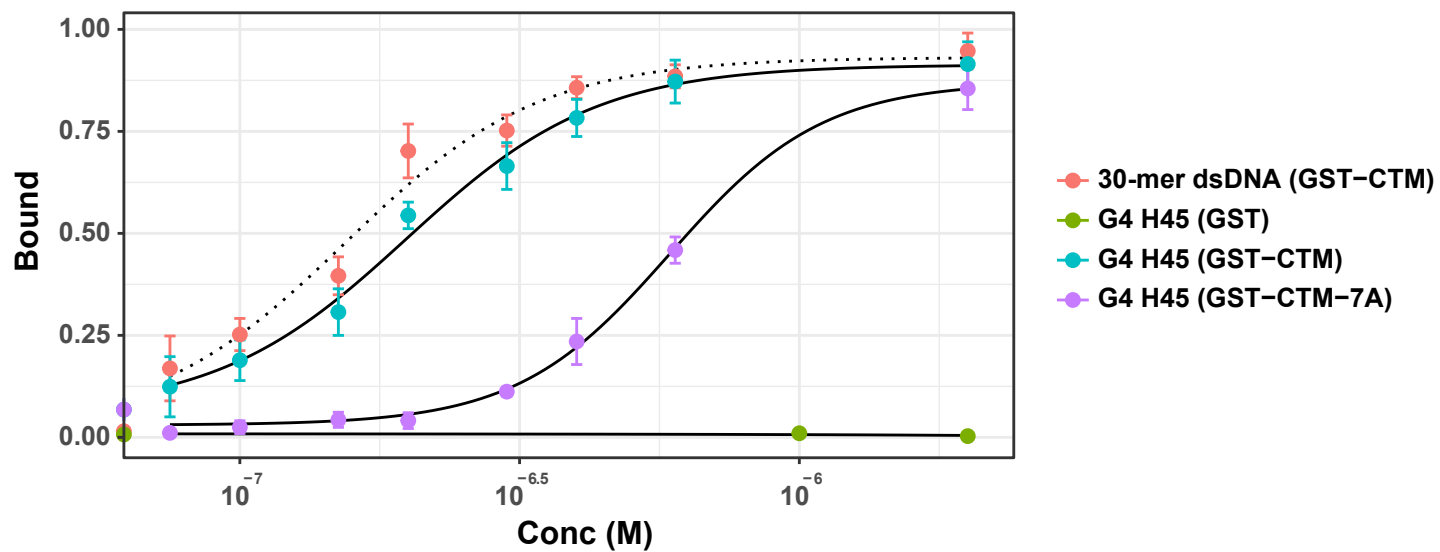

Figure S3

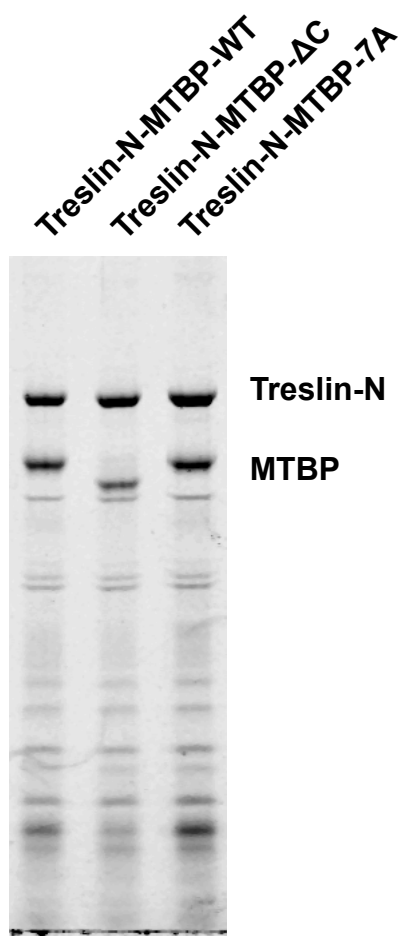

Figure S4

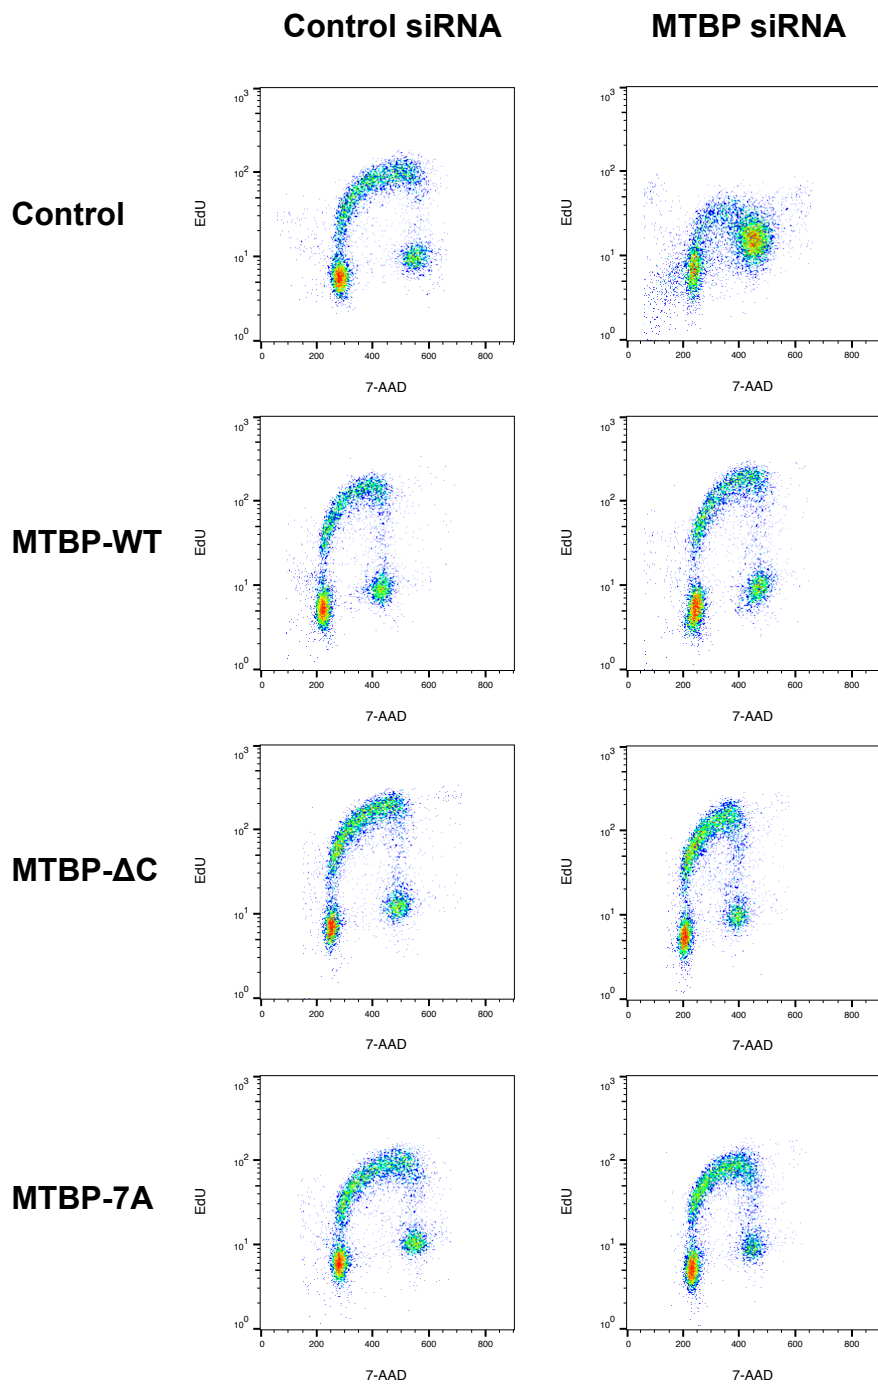

**Figure S5**

**Table S1.** List of Oligonucleotides Used in This Study

siRNA

Control: ON-TARGET plus non-coding siRNA #1 (Dharmacon)  
ON-TARGET plus MTBP #1: UCACAUUGUUGGAUGCUAAUU (Dharmacon)  
ON-TARGET plus MTBP #2: GAGAGAAACAGUUAGCUAAUU (Dharmacon)

Cloning of *Xenopus* MTBP from *Xenopus* oocyte cDNA library

Forward: TTCTCCGCTTCCCCTGGTGT  
Reverse: AGTCCTCTGTGCTTTCTTCAGC

Cloning of MTBP amino acids 436-860 into pH10UE for antibody production

Forward: GGAATTCCATATGAGAGAGCAGATACTAGCC  
Reverse: ATAAGAATGCGGCCGCCTCTGTGCTTTCTTCAGC

For Production of siRNA-resistant MTBP

MTBP #1

Forward: GGAAAAGCAACTGGCCAATGTTCAAGTTTTAGCTTTGGAAG  
Reverse: GGCCAGTTGCTTTTCCCTCTGTACAATCTGCTCCC

MTBP #2

Forward: TACCCTCCTCGACGCCAAAGAATTGCTGAAGTACTTTACCTC  
Reverse: GCGTCGAGGAGGGTAATTGAGTCCCGAGGACC

Steps in Construction of pcDNA5/TO-MTBP-Twin-Strep and pcDNA5/FRT/TO-MTBP-Twin-Strep

i. Amplification of Human MTBP cDNA

Forward: GTTTAAACTTAAGCTTGGCCACCATGGATCGGTACCTGC  
Reverse: CTTTCTTGCTTGTCTTTTCTAATACCC

ii. Amplification of pcDNA5/TO and pcDNA5/FRT/TO

1: CCAAGCTTAAGTTTAAACGC  
2: TGAGCAGATATCCAGCACAGTGG

iii. Tagging C-terminal end of MTBP with Twin-Strep

1: Twin-Strep-5  
AGACCCACCATGGCTAGCTGGAGCCACCCTCAGTTTCGAGAAAGGCGGAGGCTCCGGAGGCG  
GATCCGGAGGCAGCGCCTGGAGCCACCCTCAGTTTCGAAAAAGGCGCCCTGGAGGTGCTGTT  
CCAGGGCCCTGATATC  
2: Twin-Strep-3



GATATCAGGGCCCTGGAACAGCACCTCCAGGGCGCCTTTTTTCGAACTGAGGGTGGCTCCAGG  
CGCTGCCTCCGGATCCGCCTCCGGAGCCTCCGCCTTTCTCGAACTGAGGGTGGCTCCAGCTA  
GCCATGGTGGGTCT

3: GGCCCAAGAAGAAGAGGAAGGTGGAGGACAGCGCTTGGAGCCACCCTCAGTTC

4: CTGGATATCTGCTCATTTTTTCGAACTGAGGGTGGC

#### Mutations of pcDNA5/TO-MTBP-Twin-Strep

##### MTBP-N (1-532)

1: GGACAAAATTAACCTTCGGCGGCGAAAACCTG

2: GAAGGTTTTAATTTTGTCCATCTTTC

##### MTBP-C (526-904)

1: TTAAACTTAAGCTTGGCCACCATGGACAAAATTAACCTTCAATATATTAATG

2: CCAAGCTTAAGTTTAAACGC

##### MTBP-ΔC

1: GAATCAAAAGGCGGCGAAAACCTG

2: GCCGCCTTTTGATTCATGCATACTTTTTTGACCTG

#### Construction of pGEX4T-CTM

1: GAAGACCCCGAGGCAATGCATGAATCAAAAACATCAAGGC

2: TCAGTCAGTCACGATTCATTTCTTGCTTGTCTTTTCTAATACCCAG

##### MTBP-824-830 7A

1: CAGCGGCAGCCACACGGATACTGAAAGAAGTA

2: GTGTGGCTGCCGCTGCTGCTGCCTTAATTTGCCTTGATGTTTTTG

##### MTBP-874-876 3A

1: CTCTAAGTTCTATCTAAAGGATCTTAAAGCTGCAGCGGGTCTATTTGAAGAAATGAAG

2: CTTCAATTTCTCAAATAGACCCGCTGCAGCTTAAAGATCCTTTAGATAGAAGCTTAGAG

##### MTBP-881-884 4A

1: CTTCAAGGGGTCTATTTGAAGCAGCGGCGGCAACAGCAAACAACAATGCTGTAC

2: GTACAGCATTGTTGTTTGTGTTGCCGCCGCTGCTTCAAATAGACCCCTTGAAG

#### pGEX4T-TEV-CTM

1: GACTGAAAATACAGGTTTTTCGGATCCACGCGGAAC

2: AAAACCTGTATTTTCAGTCTATGCATGAATCAAAAACATCAAGG

#### Oligonucleotides used for EMSA experiments

##### ds 30-mer

1: ATAGAGTGTTGCCAGTCTCAAGTACCATGC

2: GCATGGTACTTGAGACTGGCAACACTCTAT

##### AT 30-mer



**Table S2.** List of Antibodies Used in This Study

| <u>Antibodies</u>             | <u>Company</u>            | <u>Catalog Number</u> |
|-------------------------------|---------------------------|-----------------------|
| Anti- <i>Xenopus</i> MTBP     | This study                | NA                    |
| Anti- <i>Xenopus</i> Treslin  | Kumagai et al. (2010)     | NA                    |
| Anti- <i>Xenopus</i> Orc2     | Kumagai et al. (2010)     | NA                    |
| Anti- <i>Xenopus</i> Cdc45    | Kumagai et al. (2010)     | NA                    |
| Anti- <i>Xenopus</i> TopBP1   | Kumagai et al. (2010)     | NA                    |
| Anti-Human Treslin            | Kumagai et al. (2010)     | NA                    |
| Anti-Human MTBP (B-5)         | Santa Cruz Biotech        | sc-137201             |
| Anti- FLAG M2                 | Sigma-Aldrich             | F1804                 |
| Anti-Histone H3               | Abcam                     | ab1791                |
| Anti-GAPDH (14C10)            | Cell Signaling Technology | #2118                 |
| Anti-Human Mcm2 (BM28)        | BD Biosciences            | 610700                |
| Anti-BrdU (MoBU-1)            | Thermo Fisher             | B35128                |
| Anti-BrdU (B44) (Mouse)       | BD Biosciences            | 347580                |
| Anti-BrdU (Bu1/75 ICR1) (Rat) | Novus                     | NB500-169             |
| Anti-ssDNA (Rabbit)           | IBL                       | 18731                 |
| Anti-StrepMAB-Classic         | IBA Life Sciences         | 2-1507-001            |
| Anti-Myc                      | Abcam                     | ab9106                |
